# Supplementary material
Source: HighWire-hosted journal article supplement (https://erj.ersjournals.com/content/56/3/2001881)
Supplement: inline-supplementary-material-1 [file inline-supplementary-material-1.pdf]

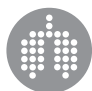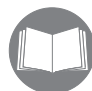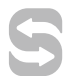

SHAREABLE PDF

# ERS Scientific Working Group 09.04, “Psychologists and behavioural scientists”: the next step towards multidisciplinary respiratory care

Andreas von Leupoldt <sup>1</sup>, Lisa Jane Brighton <sup>2</sup>, Jeannette Peters<sup>3</sup>,  
Eleonora Volpato<sup>4,5</sup>, Marieke Verkleij<sup>6</sup>, Ann Hutchinson<sup>7</sup>, Monique Heijmans<sup>8</sup>,  
Ingeborg Farver-Vestergaard<sup>9</sup>, Daniel Langer <sup>10</sup> and Martijn A. Spruit <sup>11,12,13</sup>,  
on behalf of the ERS Scientific Working Group 09.04

**Affiliations:** <sup>1</sup>Health Psychology, University of Leuven, Leuven, Belgium. <sup>2</sup>Cicely Saunders Institute of Palliative Care, Policy and Rehabilitation, King's College London, London, UK. <sup>3</sup>Dept of Medical Psychology and Dept of Lung diseases, Radboud University Medical Center, Radboud Institute for Health Sciences, Nijmegen, The Netherlands. <sup>4</sup>Dept of Psychology, Università Cattolica del Sacro Cuore, Milan, Italy. <sup>5</sup>IRCCS Fondazione Don Carlo Gnocchi, Milan, Italy. <sup>6</sup>Dept of Paediatric Psychology, Amsterdam UMC, Vrije Universiteit Amsterdam, Amsterdam, The Netherlands. <sup>7</sup>Hull York Medical School, University of Hull, Hull, UK. <sup>8</sup>Netherlands Institute for Health Services Research (Nivel), Utrecht, The Netherlands. <sup>9</sup>Dept of Medicine, Vejle Hospital, Hospital Little Belt, Vejle, Denmark. <sup>10</sup>Faculty of Kinesiology and Rehabilitation Sciences, Dept of Rehabilitation Sciences, Research Group for Cardiovascular and Respiratory Rehabilitation, KU Leuven – University of Leuven, and Respiratory Rehabilitation and Respiratory Division, University Hospital Leuven, Leuven, Belgium. <sup>11</sup>Dept of Research and Development, CIRO, Horn, The Netherlands. <sup>12</sup>Dept of Respiratory Medicine, Maastricht University Medical Centre (MUMC+), NUTRIM School of Nutrition and Translational Research in Metabolism, Maastricht, The Netherlands. <sup>13</sup>Reval Rehabilitation Research, Biomedical Research Institute, Faculty of Rehabilitation Sciences, Diepenbeek, Belgium.

**Correspondence:** Andreas von Leupoldt, Health Psychology, University of Leuven, Tienestraat 102, B-3000 Leuven, Belgium. E-mail: andreas.vonleupoldt@kuleuven.be

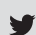

@ERSpublications

The new ERS Scientific Working Group 09.04 “Psychologists and Behavioural Scientists” will support psychological and behavioural aspects of respiratory care, in order to improve multidisciplinary clinical practice, education, and research <https://bit.ly/2OPJF0U>

**Cite this article as:** von Leupoldt A, Brighton LJ, Peters J, *et al.* ERS Scientific Working Group 09.04, “Psychologists and behavioural scientists”: the next step towards multidisciplinary respiratory care. *Eur Respir J* 2020; 56: 2001881 [<https://doi.org/10.1183/13993003.01881-2020>].

This single-page version can be shared freely online.

Impaired lung function is a cardinal feature in people with various chronic respiratory diseases, which is predominantly treated pharmacologically with additional smoking cessation if appropriate. Despite optimal medical treatment, many people with respiratory disease still experience daily physical, psychological and social limitations [1, 2]. As the degree of lung function impairment only partially explains these daily limitations, diagnostics and management must focus beyond biomedical and pharmacological approaches. Therefore, the role of allied respiratory professionals is essential within comprehensive disease management programmes, including adequate diagnostics, disease monitoring, and tailored non-pharmacological therapy options.
